# Supplementary material for: A molecular dynamics test of the Hertz–Knudsen equation for evaporating liquids
Source: Royal Society of Chemistry journal article supplement (doi:10.1039/c5sm01508a), 2015-01-01
Supplement: c5sm01508a1.pdf [file c5sm01508a1.pdf]

## SUPPORTING INFORMATION

“Molecular dynamics test of the Hertz-Knudsen equation for evaporating liquid”

R.Holyst, M.Litniewski, D.Jakubczyk

*Tables, figures, and formulas given in this section are marked by numbers preceded by S. If S is not present, the denotation refers to the main body of the paper.*

The factor that we take into account in simulations of gas-liquid system is the so called step error<sup>S1</sup> (called also the truncation error) of the numerical algorithm used for the simulation. In the case of standard Verlet algorithm<sup>S2</sup> applied for typical Lennard-Jones (LJ) liquid at time step  $\Delta t = 0.01$  the step error “shifts” the pressure by around  $0.01$ <sup>S1</sup>, all in the reduced LJ units. For the LJ algorithm the “shift” is proportional to  $\Delta t^2$  so the effect may be non-negligibly even for  $\Delta t = 0.001$ . The step error is especially important for the gas-liquid systems since the effect strongly decreases with decreasing density<sup>S1</sup>. As a result, even in the equilibrium state, the pressure calculated for the vapor may significantly differ from that for the liquid, which is obviously a numerical artifact due to the finite value of  $\Delta t$ . In our case, both for the equilibrium and non-equilibrium simulations the pressure in the gas phase was higher by around  $2.5 \times 10^{-5}$  from that in the liquid. Generally, the difference determines the accuracy limit for the simulation. However, here we can go beyond the limit by taking in the calculations of  $j_{HK}$  only the liquid parameters, which cancels the error in the  $(p_{liq} - p_{eq})$  term in Eq(1). As a result, the ratio  $j_{HK}/j_m$  is not burdened with the discussed error. In the range of random errors,  $j_{HK}/j_m$  is constant (Fig. 2, Table S2) in spite of the fact that  $(p_{liq} - p_{eq})$  changes from  $2.8 \times 10^{-5}$  to  $1.86 \times 10^{-4}$ .

In order to attain desired accuracy level, the equations of motion considered in the paper were solved applying the Cowell-Numerov<sup>S1,S3</sup> 4-th order implicit method:

$$\mathbf{r}_i(t + \Delta t) = 2\mathbf{r}_i(t) - \mathbf{r}_i(t - \Delta t) + \frac{\Delta t^2}{12}(\mathbf{F}_i(t + \Delta t) + 10\mathbf{F}_i(t) + \mathbf{F}_i(t - \Delta t)) \quad (\text{S1})$$

$$\mathbf{v}_i(t + \Delta t) = \frac{\mathbf{r}_i(t + \Delta t) - \mathbf{r}_i(t)}{\Delta t} + \frac{\Delta t}{24}(7\mathbf{F}_i(t + \Delta t) + 6\mathbf{F}_i(t) - \mathbf{F}_i(t - \Delta t)) \quad (\text{S2})$$

where  $\mathbf{r}_i$ ,  $\mathbf{v}_i$ , and  $\mathbf{F}_i = -\Sigma \partial \phi_{ij} / \partial \mathbf{r}_i$  are the position, the velocity, and the force vector for the  $i$ -th particle. Eqs. (S1), were solved for the time step  $\Delta t = 0.005$  using the iteration procedure from Ref. S1.

A successful analysis of simulation results requires estimation of errors. We estimated the standard error  $\sigma_e$  of measured quantity  $X$  by dividing the simulation data in  $n_d$  equal intervals, for 13 values of  $n_d$  varied from 8 to 20. The values of the standard deviation,  $\sigma_w$ , for the set of  $n_d$  data were calculated from the standard formula:

$$\sigma_w^2(X) = \frac{1}{n_d(n_d - 1)} \sum_{d=1}^{n_d} (\langle X \rangle_d - \langle X \rangle)^2 \quad (\text{S3})$$

where  $\langle \rangle_d$  means the average over the interval and  $\langle \rangle$  the average over the whole data range. were used to estimate  $\sigma_e$  by analyzing  $\sigma_w$  (S3) as a function of  $n_d$  (see also chapter 6.4 in Ref. S2). The analysis of  $\sigma_w$  (S3) as a function of  $n_d$  (see also chapter 6.4 in Ref. S2) was used to estimate  $\sigma_e$ , given in Table. S1.

| $n_0$ | $L_x=L_y$ | $L_z$  | $T_{liq}$  | $p_{liq}=p_{eq}$ | $\sigma_e(p_{eq}^l)$ | $(p_{liq}-p_{eq}(T_{liq}))/\sigma_e(p_{eq}^l)$ |
|-------|-----------|--------|------------|------------------|----------------------|------------------------------------------------|
| 1     | 91.74     | 704.1  | 0.89916(6) | 0.032165(9)      | 0.000018             | 0.25                                           |
| 2     | 91.74     | 1008.2 | 0.89938(6) | 0.032193(14)     | 0.000026             | -0.68                                          |
| 3     | 90.96     | 943.8  | 0.87548(5) | 0.026958(7)      | 0.000015             | 0.53                                           |
| 4     | 90.16     | 1009.9 | 0.85001(8) | 0.022059(6)      | 0.000015             | 0.52                                           |
| 5     | 90.16     | 1468.1 | 0.85011(6) | 0.022054(8)      | 0.000015             | -0.96                                          |
| 6     | 88.84     | 1254.3 | 0.7971(1)  | 0.013966(7)      | 0.000013             | 0.08                                           |

Table S1. The results of the gas-liquid equilibrium simulations. The total time of measurements during a single simulation run amounted always to  $10^5$  in LJ units. The figures in parenthesis give the estimation for the standard error  $\sigma_e$  of the equilibrium pressure in units of the last digit of the corresponding value.  $T_{liq}$  and  $p_{liq}=p_{eq}$  are the equilibrium values for a given simulation. They were used in the minimization of Eq (6) weighted by the error in the equilibrium pressure  $\sigma_e(p_{eq}^l)$ . Since  $T_{liq}$  and  $p_{liq}$  are not independent quantities,  $\sigma_e(p_{eq}^l)$  is obtained by analyzing the fluctuations of  $p_{eq}^i = p_{liq}^i + (\partial p_{eq}/\partial T)_{T=T_{liq}^i} (T_{liq}^i - T_{liq})$  where the sup index  $i$  denotes the current value and  $\partial p_{eq}/\partial T$  is taken from Eq.(6).

|   | $L_z$  | $\tau/10^3$ | $\rho_{liq}$ | $T_{liq}$ | $T_{heat}$ | $\rho_{heat}$ | $p_{liq}$ | $j_m \times 10^4$ | $j_{HK} \times 10^4$ |
|---|--------|-------------|--------------|-----------|------------|---------------|-----------|-------------------|----------------------|
| 1 | 1468.1 | 40          | 0.66955      | 0.88872   | 3.00       | 0.0100        | 0.02997   | 3.19              | 0.80(9)              |
| 2 | 1009.9 | 65          | 0.66528      | 0.89440   | 1.75       | 0.01825       | 0.03121   | 1.92              | 0.620(65)            |
| 3 | 1468.1 | 55          | 0.67724      | 0.87819   | 2.00       | 0.0140        | 0.02763   | 1.65              | 0.48(8)              |
| 4 | 1468.1 | 55          | 0.69472      | 0.85322   | 2.00       | 0.0115        | 0.02273   | 1.60              | 0.42(6)              |
| 5 | 1468.1 | 75          | 0.67788      | 0.87731   | 1.75       | 0.0160        | 0.02741   | 1.26              | 0.350(45)            |
| 6 | 1009.9 | 90          | 0.68646      | 0.86520   | 1.30       | 0.02025       | 0.02495   | 0.91              | 0.250(45)            |
| 7 | 1468.1 | 150         | 0.68541      | 0.86669   | 1.40       | 0.0188        | 0.02523   | 0.73              | 0.23(5)              |
| 8 | 1468.1 | 190         | 0.68551      | 0.86651   | 1.20       | 0.0225        | 0.02517   | 0.46              | 0.120(45)            |
| 9 | 1468.1 | 200         | 0.68430      | 0.86826   | 1.10       | 0.0255        | 0.02552   | 0.32              | 0.120(45)            |

Table S2. The evaporation parameters in the quasi stationary regime of evaporation.  $\tau$  is the time of the data collection. For all systems:  $L_x = L_y = 90.16$ . The results for  $n_0 = 7, 8, 9$  are the mean of two independent simulation runs and  $\tau$  gives the sum of the times.  $j_{HK}$  is calculated during the quasi stationary stage using Eq(1) with  $p_{eq}(T_{liq})$  from Eq(6). The figures in parenthesis give the standard error  $\sigma_e(j_{HK})$  in units of the last digit of the corresponding value. The errors in  $j_m$  were many times

lower than  $\sigma_\epsilon(j_{HK})$ . For all the systems  $0.85 < T_{liq} < 0.9$ , during evaporation. This was the optimal range of temperature (see Table S1) for the interpolation  $p_{eq}$  by Eq(6) .

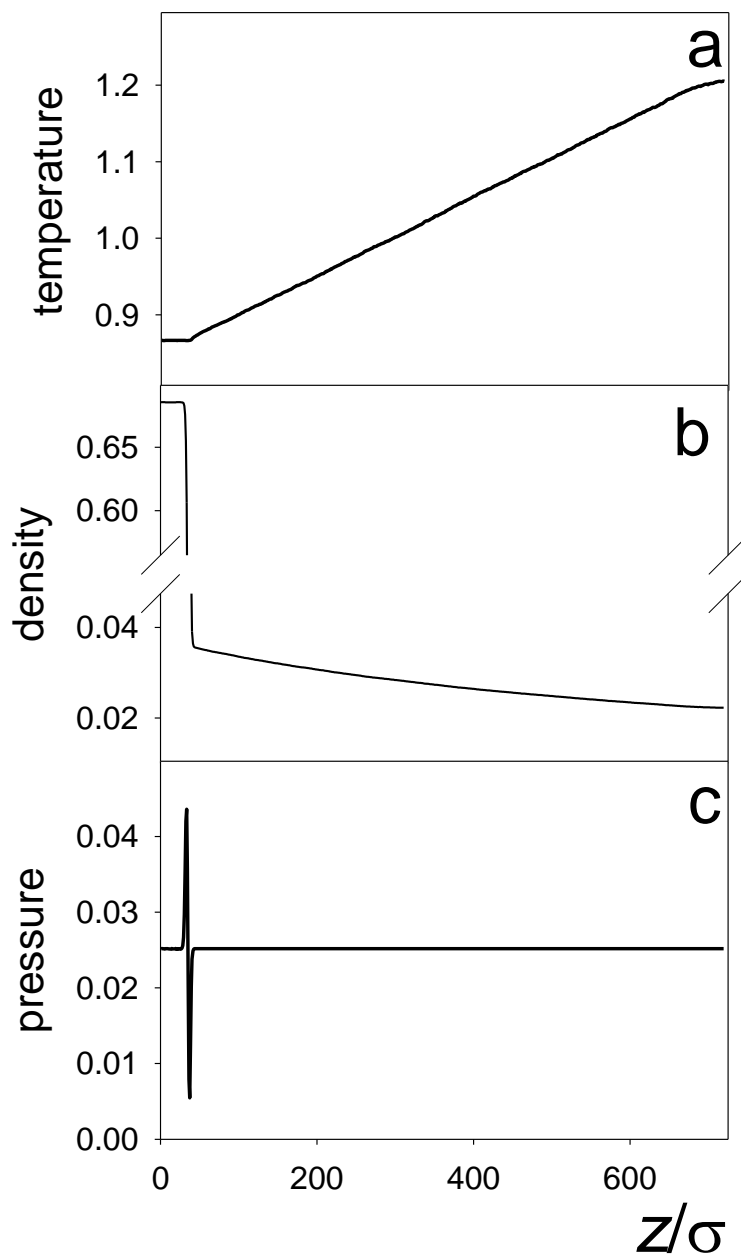

Figure S1. The profiles of the temperature (a), the density (b) and, the pressure (c) (all in the reduced LJ units) during the quasi stationary stage for the simulation run  $n_0$  8 in Table S2. The temperature (a)

changes linearly with the distance  $z$  from  $T_{heat}$  at the border of the simulation box to  $T_{liq}$  at the gas-liquid interface. The temperature is constant and equal to  $T=T_{liq}$  in the whole liquid slab. The vapor density (b) changes in such a way that together with the temperature changes assures a constant pressure in the vapor phase. Finally within the simulation error of the pressure in the liquid is equal to that in the vapor (c).

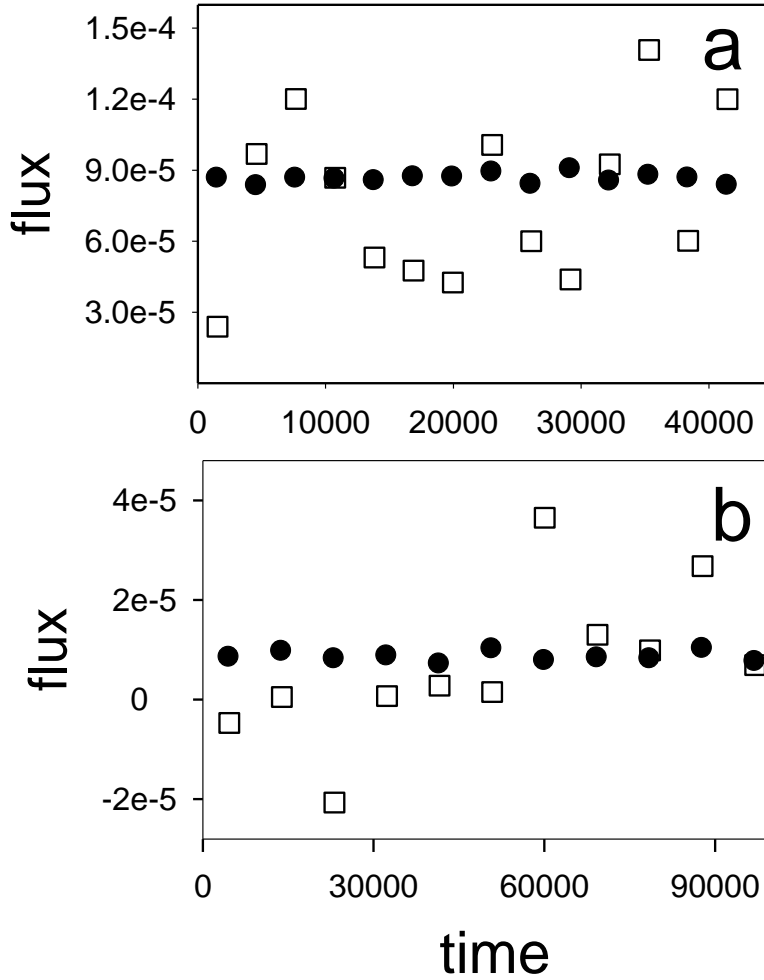

Figure S2. Current values of  $j_{HK}$  (empty squares) and  $\alpha^{-1}j_m$  (black circles) as a function of time (all in the reduced LJ units) in the stationary stage for the simulation runs  $n_0 1$  (Fig S2a) and  $n_0 9$  (Fig. S2b) from Table S2. Both in Fig. S2a and S2b the time evolutions of  $j_{HK}$  is characterized by very large long time fluctuations whereas  $j_m$  is nearly constant. This suggests that the mechanism of evaporation is not properly grasp by the HK equation (Eq(1)).

In the stationary regime of evaporation the flux as shown in Fig. S2 and Fig. 3 in the main text is constant. This is the main proof that our simulations are indeed in this regime. Because the evaporation is generally a very slow process therefore the differences between stationary and non-stationary regime in the density, temperature and pressure are not very pronounced. This fact is illustrated in Fig. S3 (dotted line is for non-stationary regime and red and green line are the profiles during quasi-stationary evaporation).

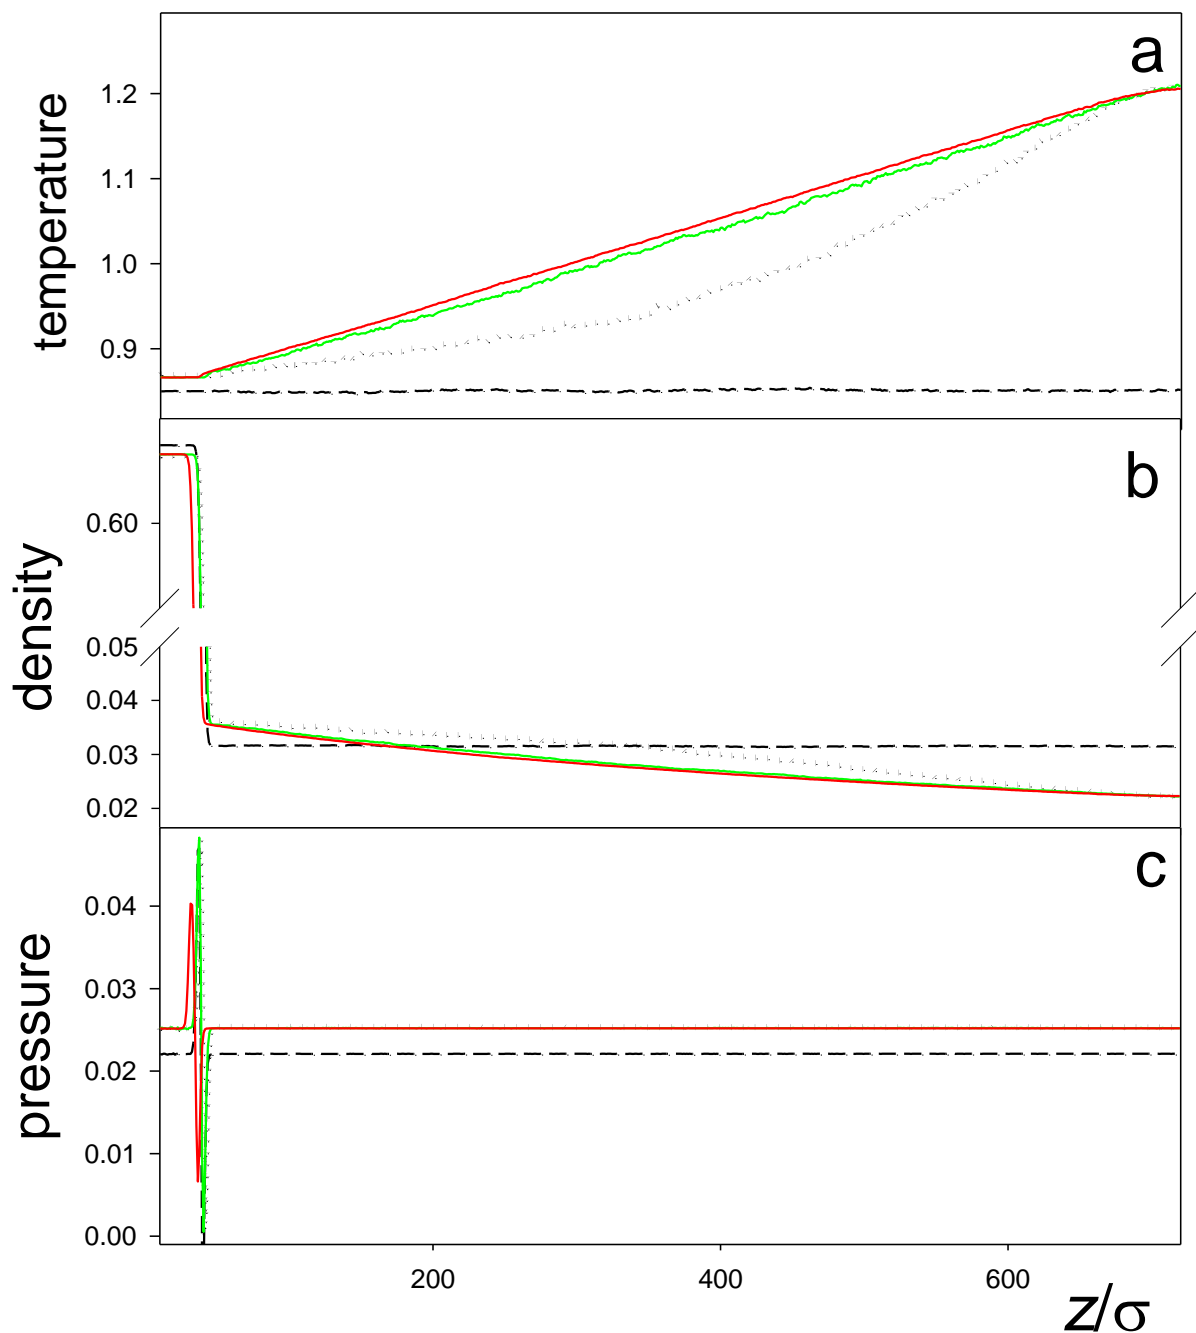

Figure S2. The temperature (a), the density (b) and the pressure (c) profile for the initial equilibrium state (the dashed line,  $n_0$  5 in Table S1) and non-equilibrium evolutions ( $n_0$  8 in Table S2). The dotted line represents the strongly non-equilibrium stage: the data averaged for  $-7000 < t < -4500$ . The green solid and red solid lines represent the non-equilibrium stationary stage: the data averaged for  $5000 < t < 10000$  (the green) and  $50000 < t < 90000$  (the red).  $t = 0$  corresponds to the moment the flux  $j_m$  becomes constant. The profiles for the stationary stage are discussed in the main body of the paper.

Finally since the HK equation is based on the assumption of the Maxwell-Boltzmann velocity distribution we have tested the  $z$ -component velocity and its distribution during evaporation in the gas phase, liquid phase and in the interfacial regime. Because in LJ units the typical velocity is 1 and the average velocity in the evaporation flux is of the order of  $10^{-3}$  the

distributions should be given by the Maxwell-Boltzmann function (MBF). Indeed Fig.S4 illustrates this hypothesis.

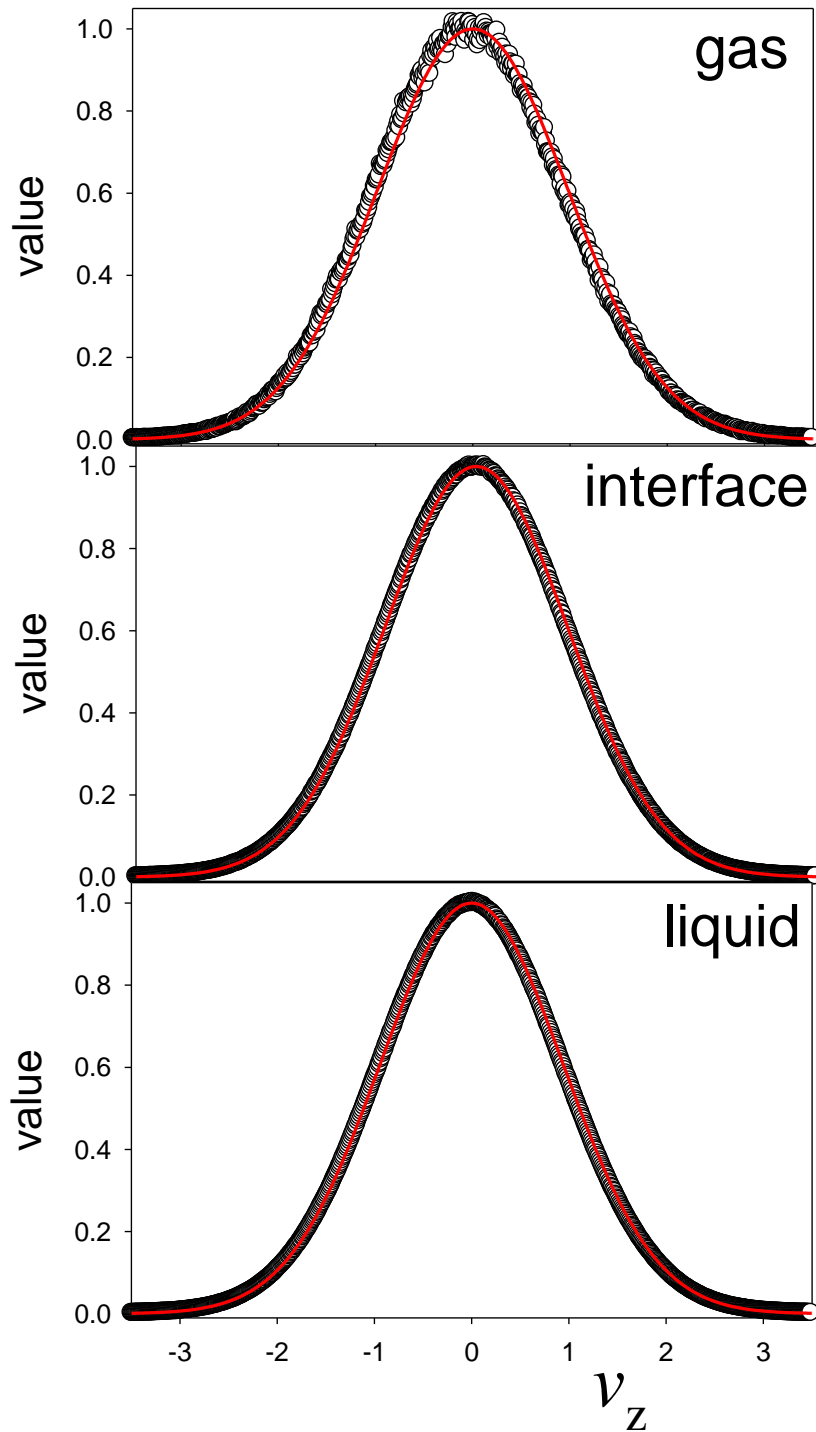

Figure S2. The velocity distribution functions (VDF( $v_z$ ), the empty circles) and the Maxwell-Boltzmann functions (MBF( $v_z$ ) =  $\exp(-v_z^2/k_B T)$ , the red line) for the evolution  $n_0$  1 (Table S2).  $VDF(u_z) = n_v(u_z, \Delta v_z) (2\pi k_B T)^{1/2} \Delta v_z^{-1}$  where  $n_v(u, \Delta v_z)$  is the average number of particles for which  $u - \Delta v_z/2 < v_z < u + \Delta v_z/2$  and  $\Delta v_z = 0.01$ . For the interface the data are collected from  $z_{liq} - \sigma < z < z_{liq} + \sigma$  and for the gas from  $z_{liq} + 18\sigma < z < z_{liq} + 22\sigma$ . In all the cases VDF excellently agrees with MBF.

S1. M. Litniewski, *Mol. Simul.* **29**, 223 (2003)

S2. M. P. Allen and D. J. Tildesley, *Computer Simulations of Liquids* (Oxford University, Oxford, 1987)

S3. R. D. Skeel, G. Zhang, and T. Schlick, *SIAM J. Sci. Comput.* **18**, 203 (1997)
